# Supplementary material for: Synthesis of hollow donut-like carbon nitride for the visible light-driven highly efficient photocatalytic production of hydrogen and degradation of pollutants
Source: Royal Society of Chemistry journal article supplement (doi:10.1039/d0nj02244f), 2020-01-01
Supplement: d0nj02244f1.pdf [file d0nj02244f1.pdf]

## Supporting Information

**Table S1.** Surface atomic ratio (C/N) determined by XPS spectra.

| <b>Samples</b>                           | <b>C/mol%</b> | <b>N/mol%</b> | <b>C/N</b> |
|------------------------------------------|---------------|---------------|------------|
| <b>bulk g-C<sub>3</sub>N<sub>4</sub></b> | 40.75         | 58.11         | 0.701      |
| <b>CMU</b>                               | 34.27         | 49.13         | 0.697      |
| <b>CMU-400</b>                           | 39.09         | 58.28         | 0.671      |
| <b>CMU-450</b>                           | 40.57         | 56.68         | 0.716      |
| <b>CMU-500</b>                           | 41.59         | 56.61         | 0.735      |
| <b>CMU-520</b>                           | 45.57         | 51.38         | 0.887      |

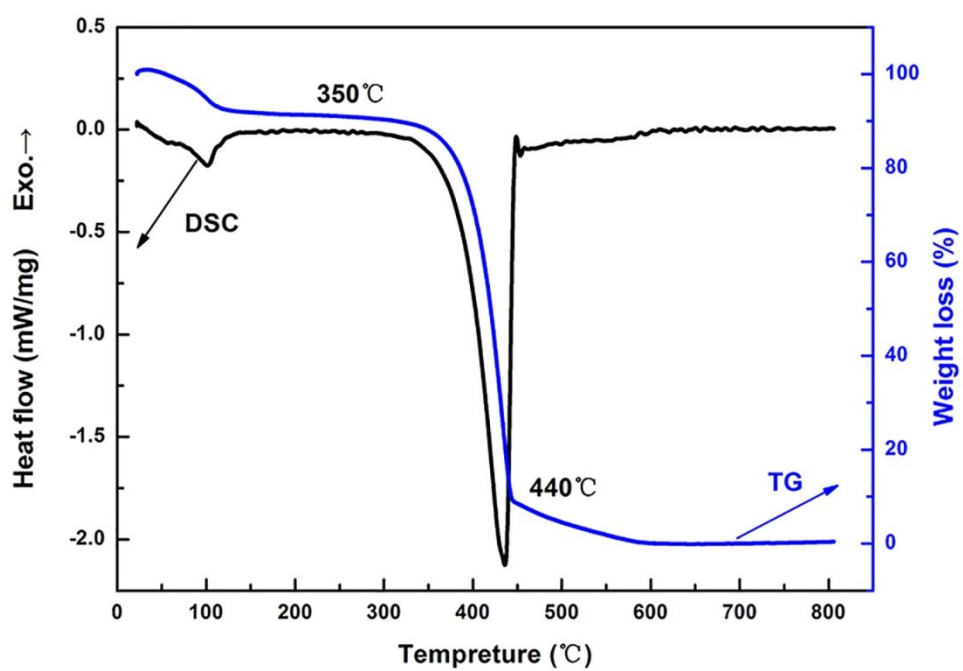

**Figure S1.** TG-DTA curve of CMU supramolecular self-assembly in the air atmosphere.

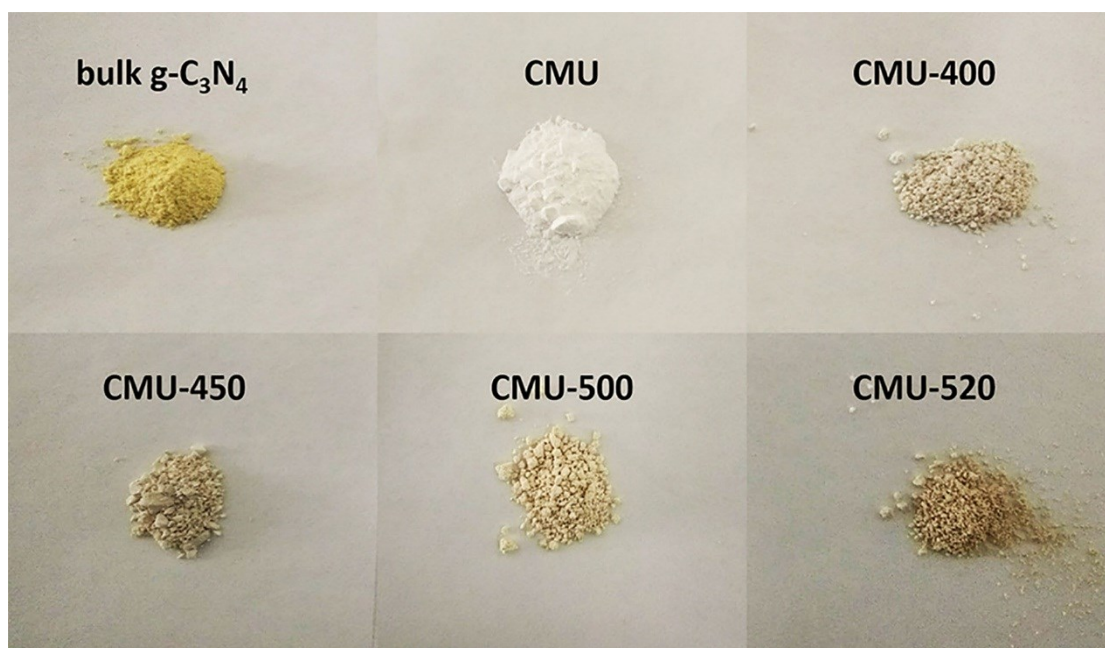

**Figure S2.** Photograph of obtained samples: bulk g-C<sub>3</sub>N<sub>4</sub>, CMU, and CMU-x.

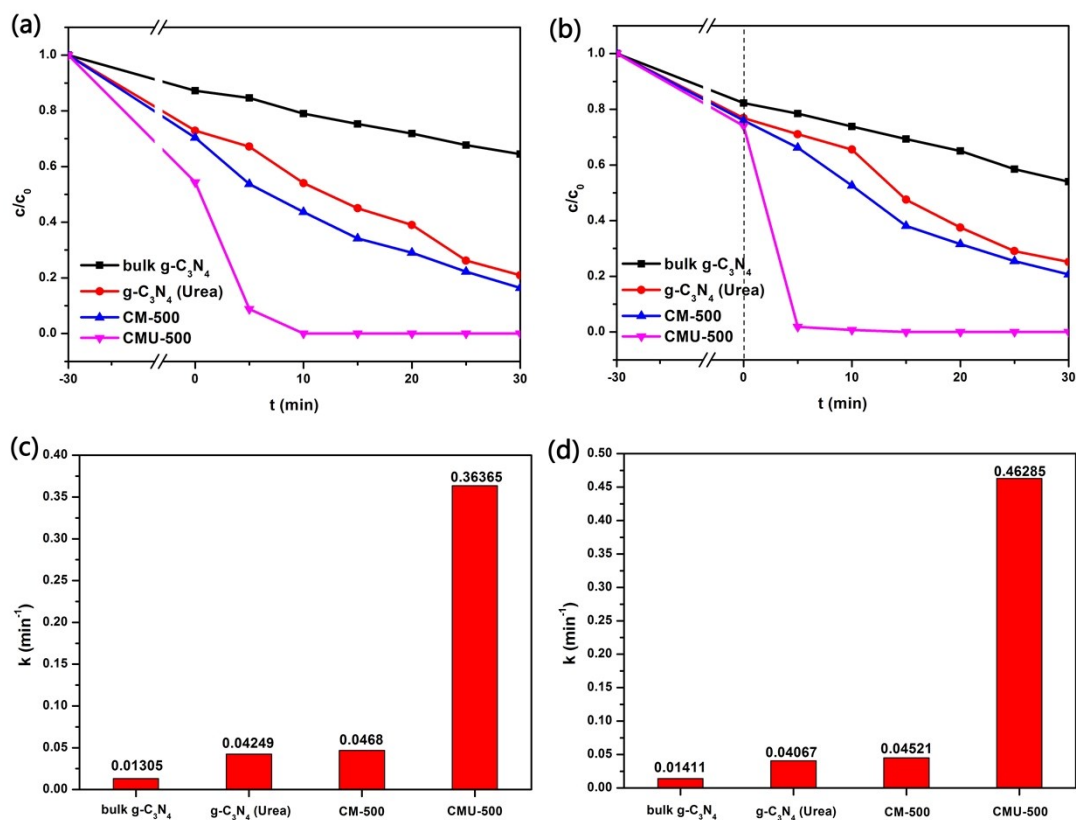

**Figure S3.** The residual fraction of (a) RhB and (b) Cr(VI) as a function of irradiation time with CMU-500 under visible light irradiation; (c) The concentration changes of RhB and Cr(VI) as a function of irradiation time with CMU-500 under visible light irradiation ( $k > 420$  nm) without adding acid and (d) with adding  $H_2SO_4$  (pH=1.82).

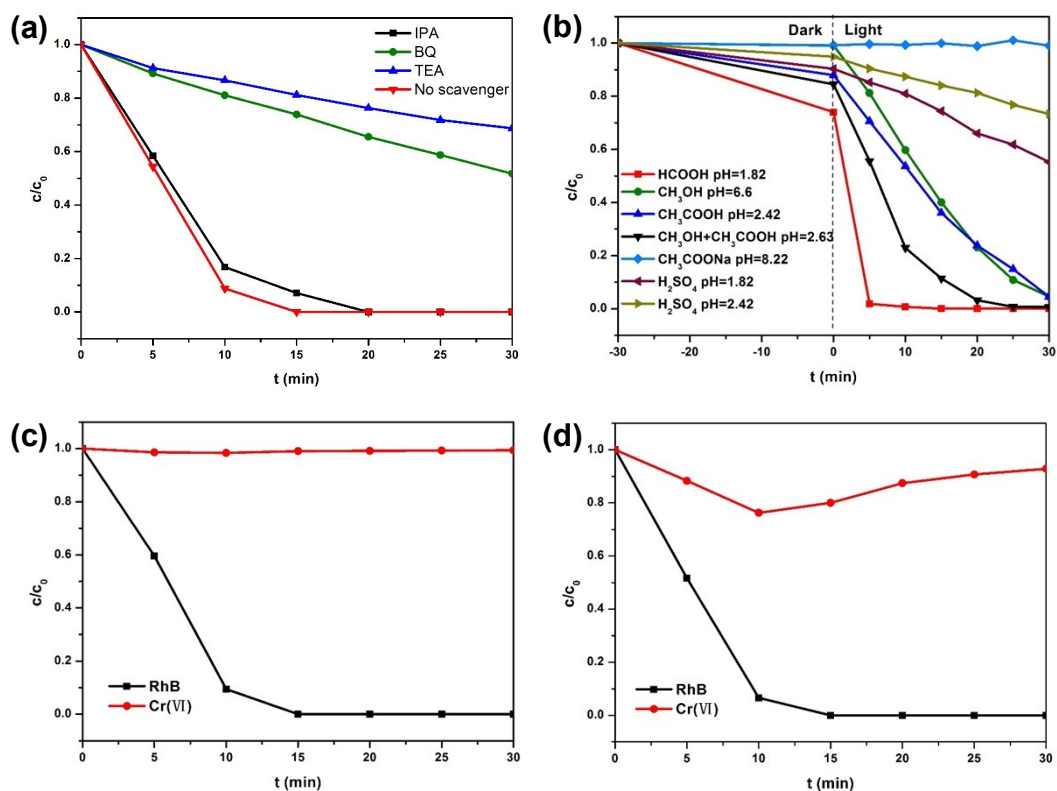

**Figure S4.** The residual fraction of (a) RhB and (b) Cr(VI) as a function of irradiation time with CMU-500 under visible light irradiation; (c) The concentration changes of RhB and Cr(VI) as a function of irradiation time with CMU-500 under visible light irradiation ( $k > 420$  nm) without adding acid and (d) with adding H<sub>2</sub>SO<sub>4</sub> (pH=1.82).

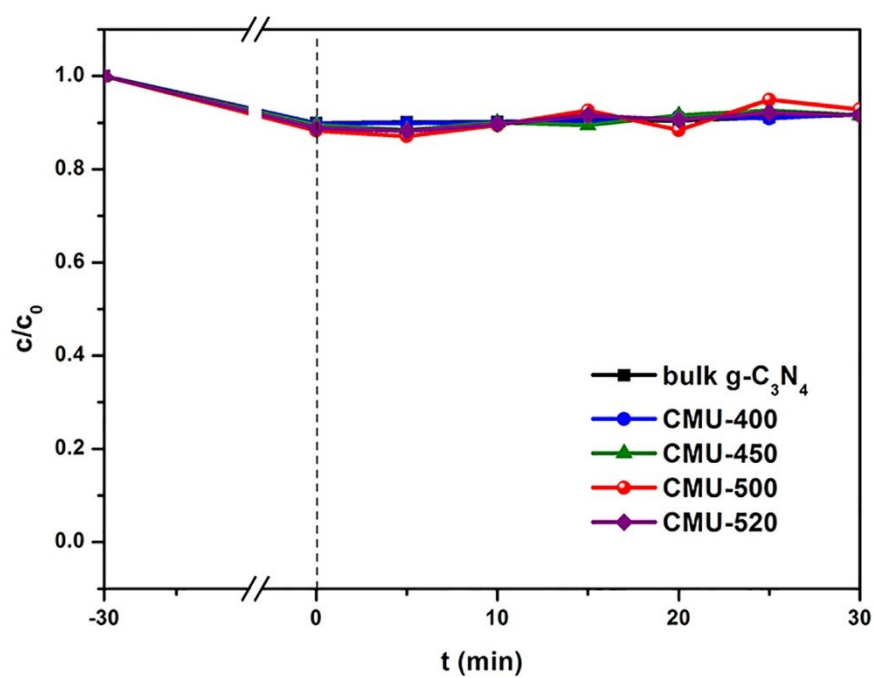

**Figure S5.** The concentration changes of Cr(VI) as a function of irradiation time with single different catalysts under visible light irradiation ( $\lambda > 420$  nm).

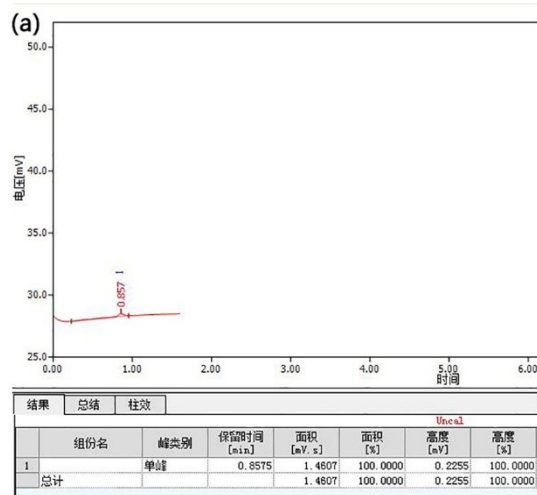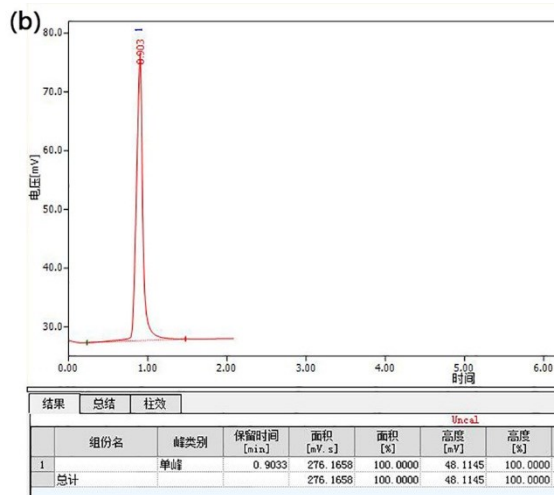

**Figure S6.** The Gas chromatogram of catalyst after hydrogen production for 4 h. (a) bulk g-C<sub>3</sub>N<sub>4</sub> and (b) CMU-500.

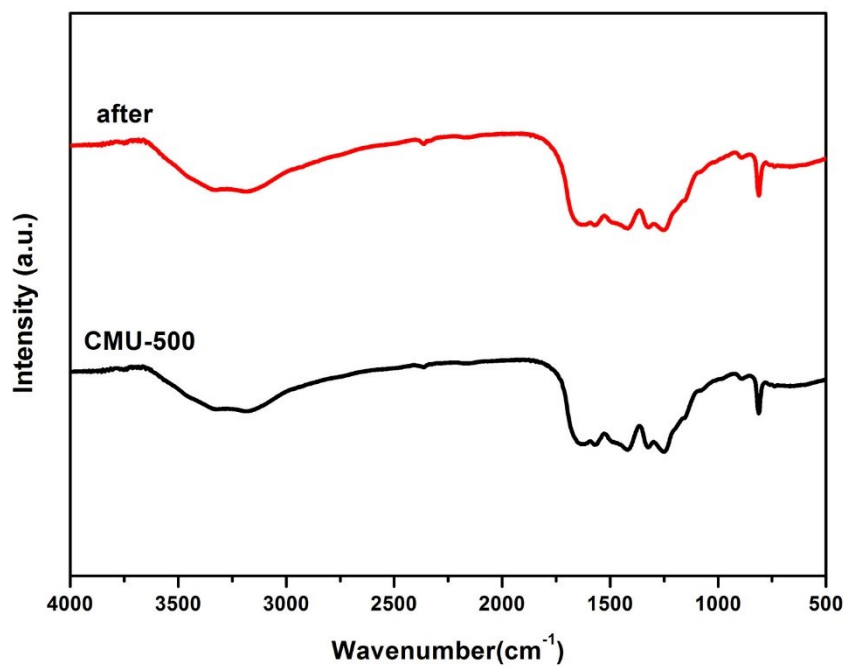

**Figure S7.** FT-IR analysis of CMU-500 after 4th run cycle photocatalytic experiments.



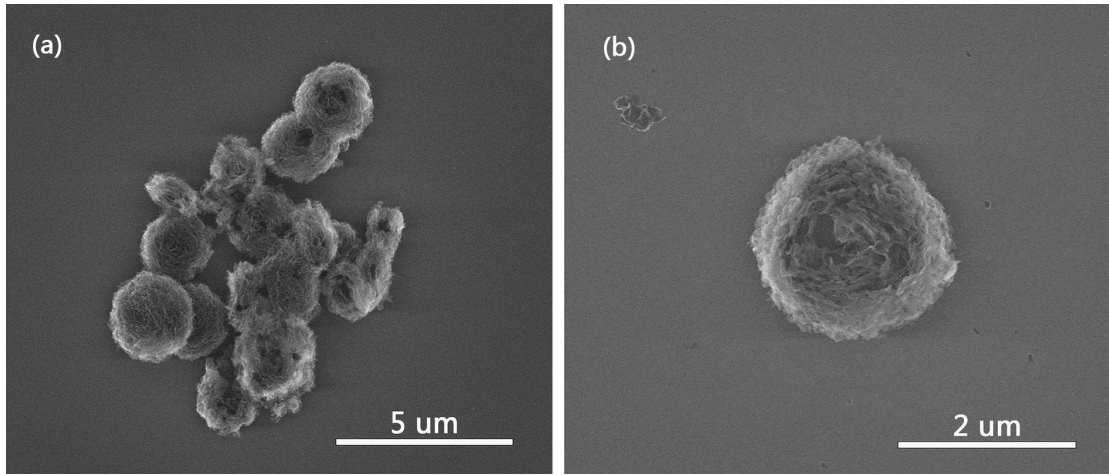

**Figure S8.** SEM images of CMU-500 having hollow erythrocyte-like structure after photocatalytic reaction.

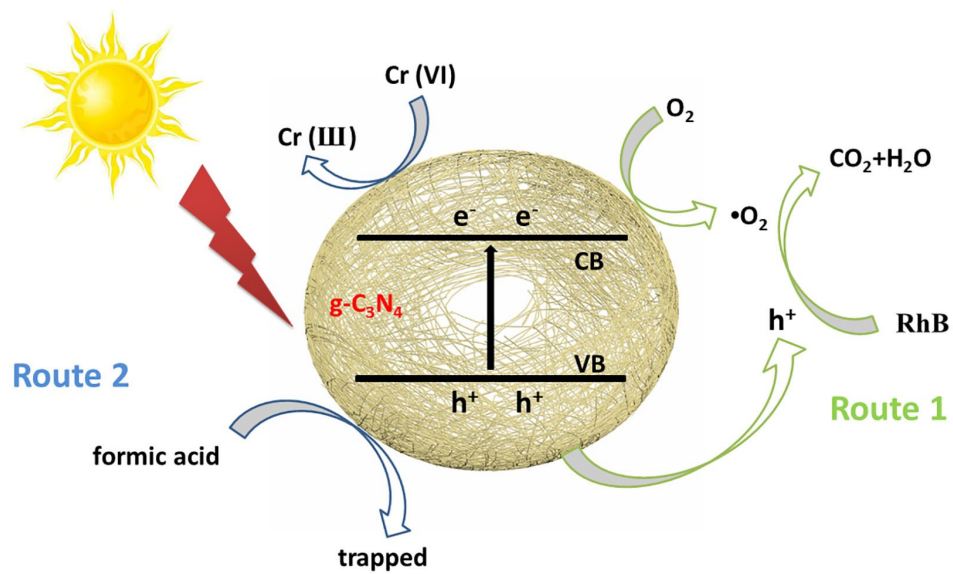

**Figure S9.** A possible mechanism diagram for removing pollutants.
